# Supplementary material
Source: PubMed Central journal article supplement (PMC4469155)
Supplement: cei0181-0051-sd1.pdf [file cei0181-0051-sd1.pdf]

### Suppl. Figure 1

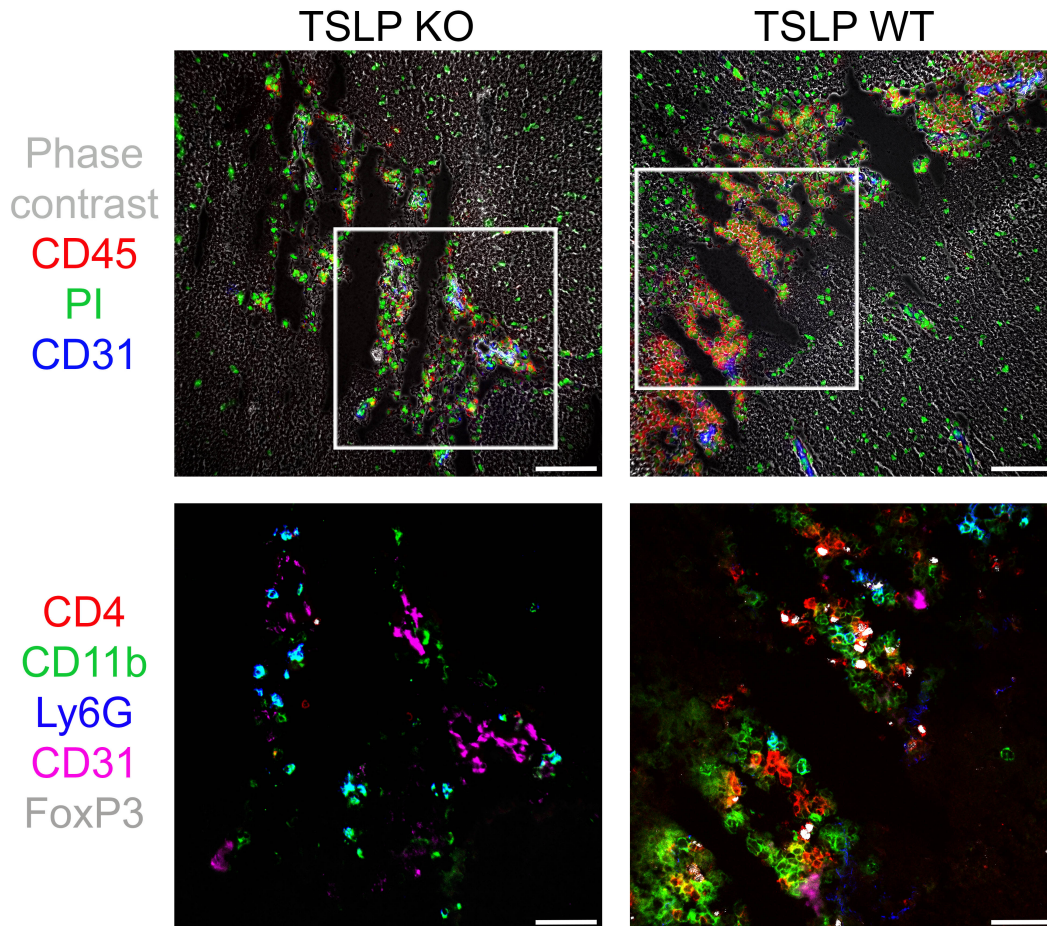

**Suppl. Figure 1: The Choroid plexus of TSLP KO mice contained fewer leukocytes in comparison to TSLP WT mice.** MELC images of brain harvested from TSLP KO mice and WT mice at day 12 after EAE induction. Upper row: Phase contrast (white), CD45+ leukocytes (red), propidium iodide+ nuclei (green), CD31+ blood vessels (blue). Lower row: CD4+ T cells (red), CD11b+ macrophages / microglial cells (green), Ly6G+ neutrophil granulocytes (blue), CD11b+/Ly6G+ granulocytes (cyan), CD31+ blood vessels (magenta), FoxP3+ regulatory T cells (red with white nuclei). Bar= 50µm.

**Healthy mice**

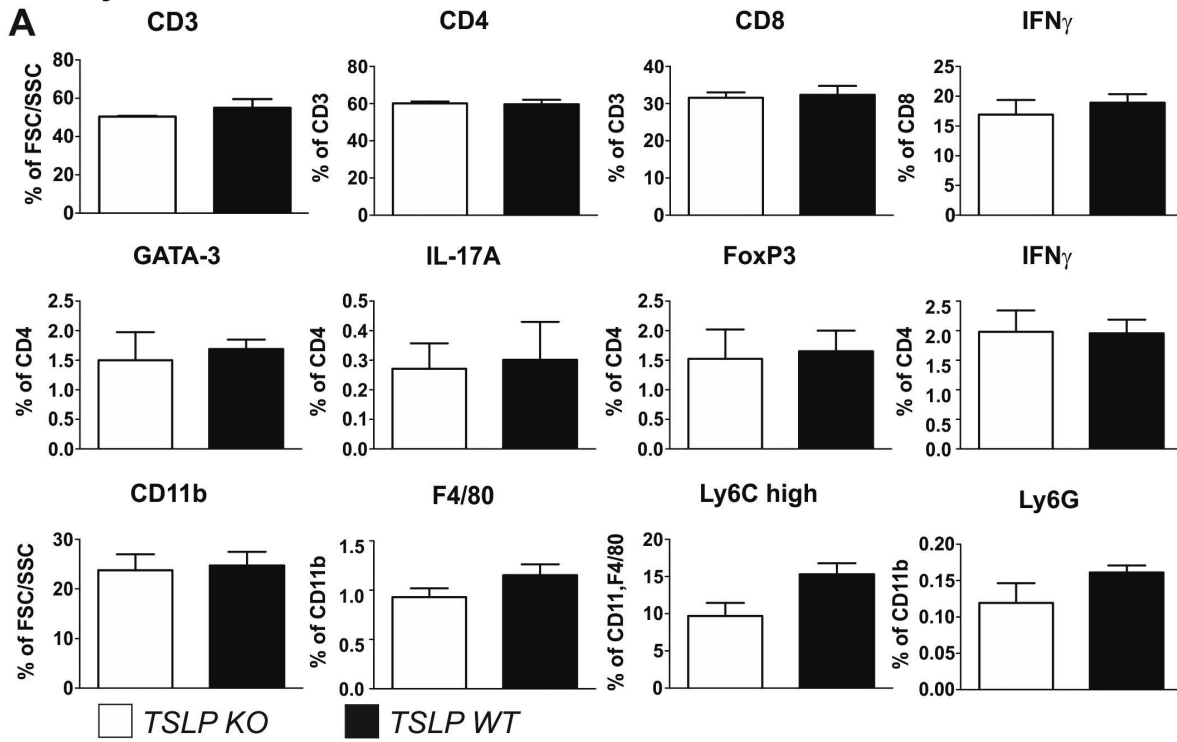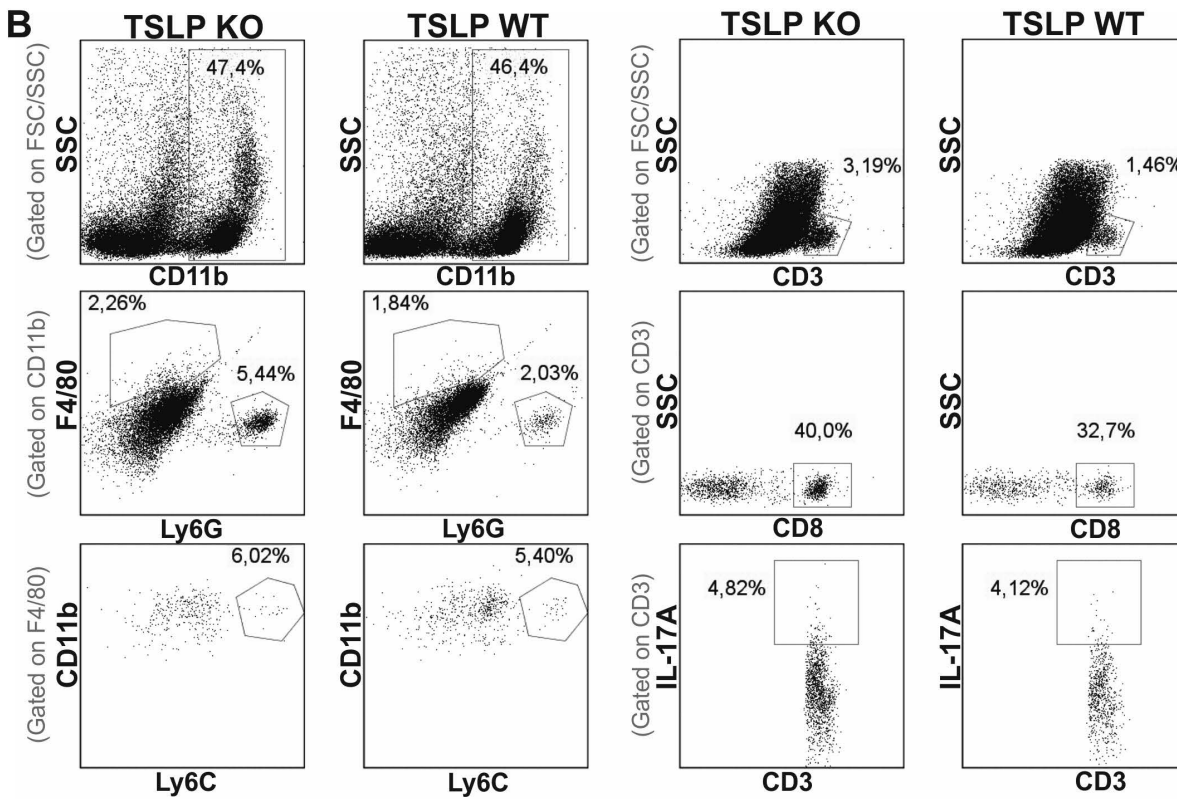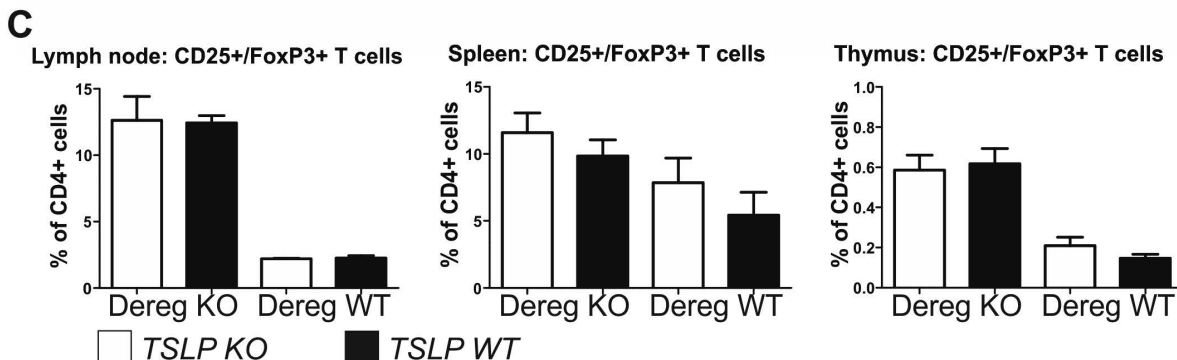

**Suppl. Figure 2: In healthy TSLP KO mice no reduction in the numbers of different T cell subtypes, macrophages or neutrophil granulocytes were observed.** (A) FACS analyses of inguinal lymph nodes (mean +/- SEM; TSLP KO n=3, TSLP WT n=4). (B) FACS analyses of brain (TSLP KO= pool of 3 mice, TSLP WT= pool of 4 mice). (C) FACS analyses of inguinal lymph nodes, spleen and thymus. Diphteria toxin was injected at day 0 and 1, organs were removed at day 4 (3 mice/group). Data (A, B) (mean +/- SEM) are representative of two and data (C) of three independent experiments.

### Suppl. Figure 3

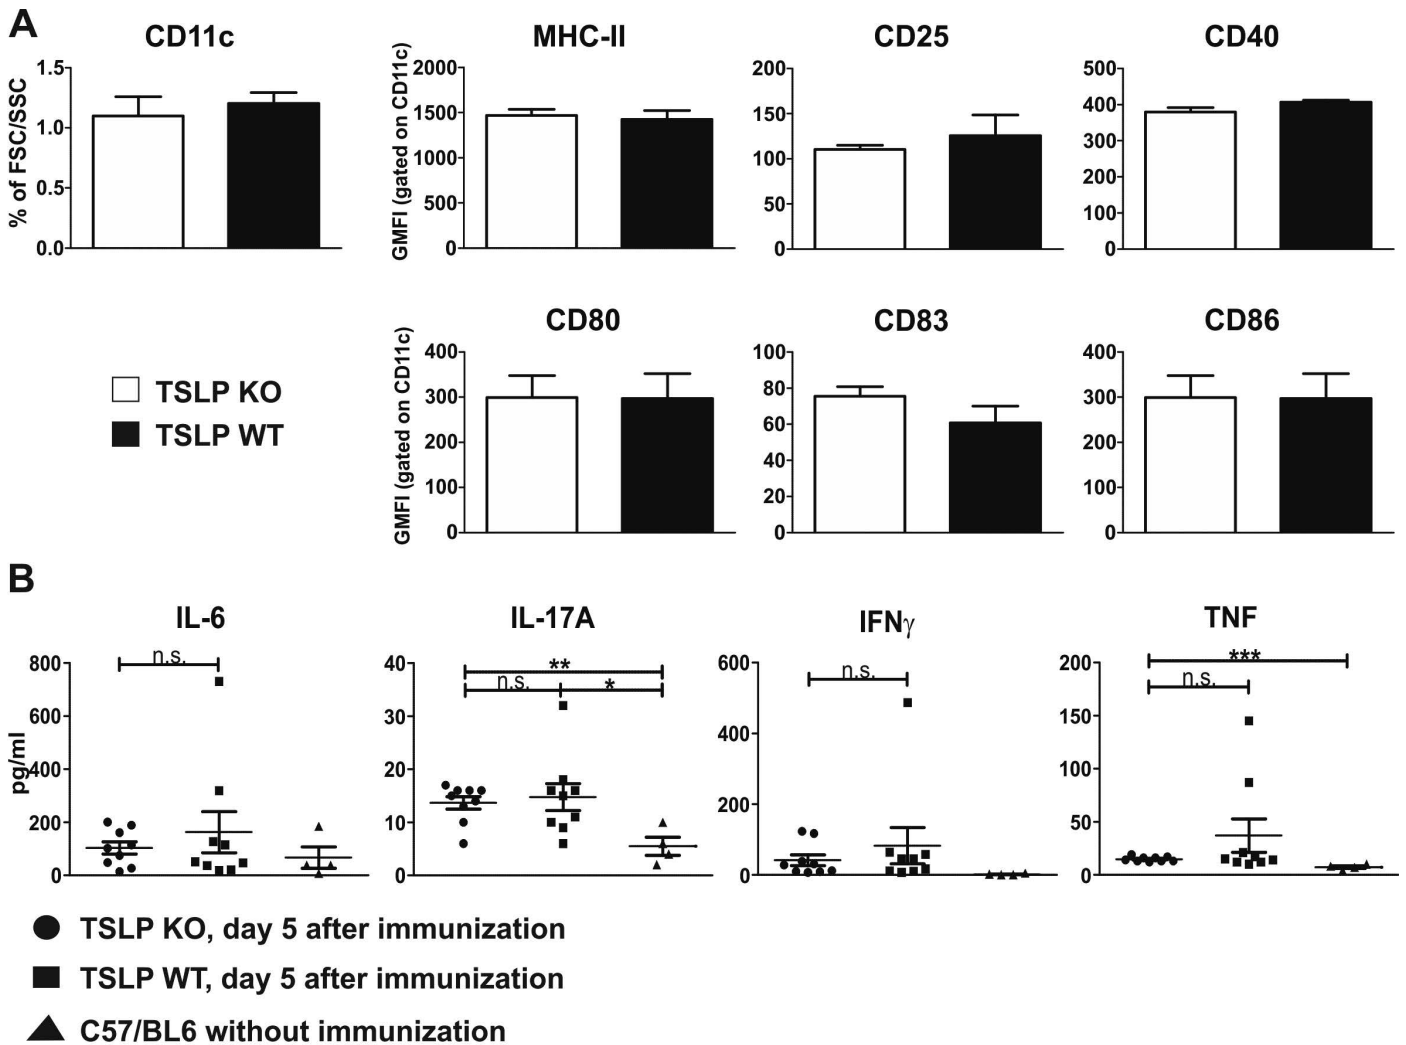

**Suppl. Figure 3: No differences in DC maturation or serum cytokine concentrations between TSLP KO and WT mice at day 5 after EAE induction.** (A) FACS analysis of spleens. GMFI= Geometric mean fluorescence intensity. The bar charts represent the mean +/- SEM. TSLP KO n=3, TSLP WT n=3. Data are representative of three independent experiments. (B) Cytometric Bead Array (CBA) of serum. TSLP KO n=9; TSLP WT n=9; untreated C57/BL6 n=4; mean +/- SEM; two-tailed unpaired Student t test: \* p<0.05, \*\* p<0.01, \*\*\* p<0.001; n.s. = not significant. Data are representative of two independent experiments.

### Suppl. Figure 4

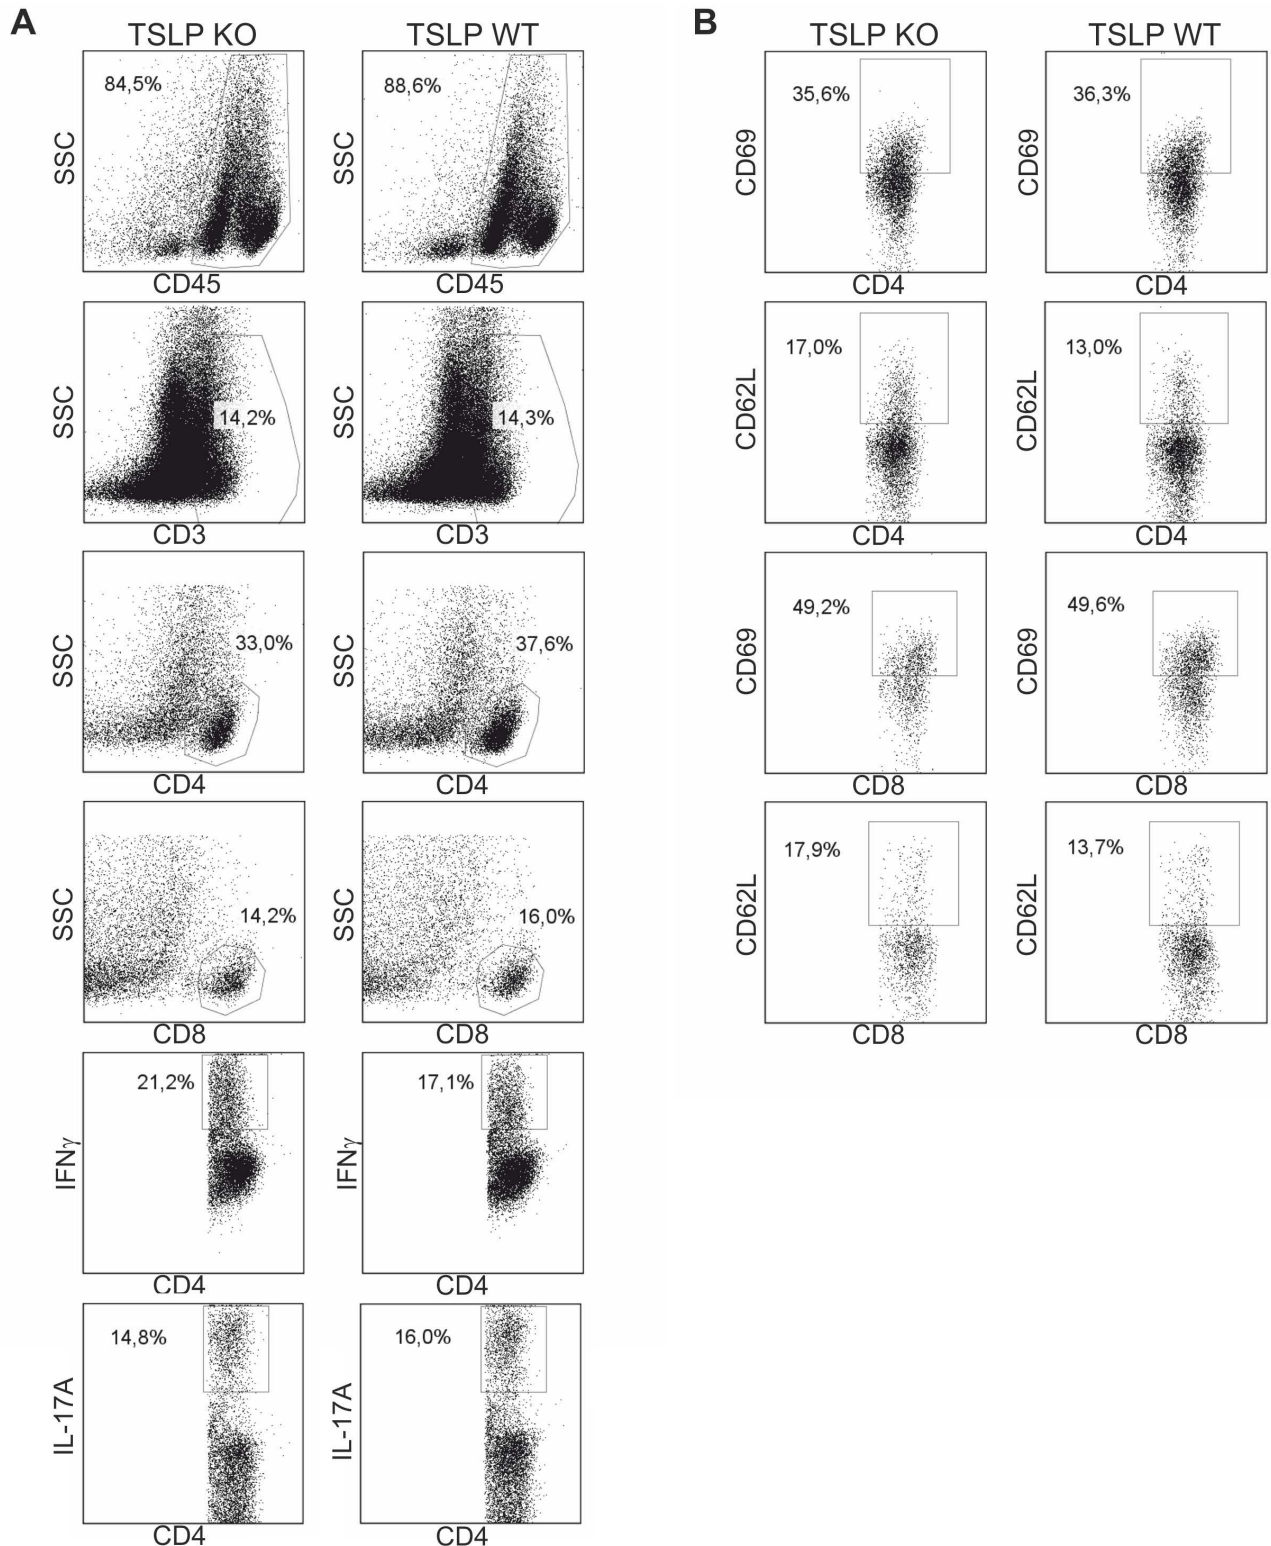

**Suppl. Figure 4: At day 20 after EAE induction TSLP KO mice and TSLP WT mice show the same extent of CNS inflammation.** Flow cytometric analysis of brain. (A) CD45+ cells were gated on FSC/SSC, CD3+ cells were gated on CD45+ cells, CD4+ and CD8+ cells were gated on CD3+ cells. IFN $\gamma$ + and IL-17A+ cells were gated on CD4+ cells. (B) CD62L+ and CD69+ cells were gated on CD4+ or CD8+ cells. Results are representative of two independent experiments (pool of three brains each).

**Suppl. table S7:** qRT-primer sets used in this study

| <b>Target</b>                  | <b>Forward 5'-3'</b>       | <b>Reverse 5'-3'</b>      |
|--------------------------------|----------------------------|---------------------------|
| <b>CCL1</b>                    | CTTACGGTCTCCAATAGCTGC      | CCTGAACTCCTGACTACCACAG    |
| <b>CCR8</b>                    | ACGTCACGATGACCGACTACT      | CCCAGCACAAACAAGACGC       |
| <b>CD3e</b>                    | ATGCGGTGGAACACTTTCTGG      | GCACGTCAACTCTACTGGT       |
| <b>CD4</b>                     | CAAGCGCCTAAGAGAGATGG       | CACCTGTGCAAGAAGCAGAG      |
| <b>CD8a</b>                    | CCGTTGACCCGCTTTCTGT        | TTCGGCGTCCATTTTCTTTGG     |
| <b>CD11b</b>                   | ATGGACGCTGATGGCAATACC      | TCCCCATTCACGTCTCCA        |
| <b>CD11c</b>                   | CTGGATAGCCTTTCTTCTGCTG     | GCACACTGTGTCCGAAGTCA      |
| <b>CD19</b>                    | GGAGGCAATGTTGTGCTGC        | ACAATCACTAGCAAGATGCC      |
| <b>CD45</b>                    | CAGAAACGCCTAAGCCTAGTTG     | AGGCAAGTAGGGACACTTCATAG   |
| <b>FoxP3</b>                   | CCCAGGAAAGACAGCAACCTT      | CCTTGCCTTTCTCATCCAGGA     |
| <b>GATA-3</b>                  | CTCGGCCATTCGTACATGGAA      | GGATACCTCTGCACCGTAGC      |
| <b>HPRT</b>                    | GTTGGATACAGGCCAGACTTTGTTG  | GATTCAACTTGCCTCATCTTAGGC  |
| <b>IFN<math>\gamma</math></b>  | AGCGGCTGACTGAACTCAGATTGTAG | GTCACAGTGTTTCAGCTGTATAGGG |
| <b>IL-4</b>                    | GGTCTCAACCCCAAGCTAGT       | GCCGATGATCTCTCTCAAGTGAT   |
| <b>IL-6</b>                    | AACCACGGCCTTCCCTACTTC      | GCCATTGCACAAGTCTTTTCTCAT  |
| <b>IL-10</b>                   | GCTCTTACTGACTGGCATGAG      | CGCAGCTCTAGGAGCATGTG      |
| <b>IL-12p40</b>                | TGGTTTGCCATCGTTTTGCTG      | ACAGGTGAGGTTCACTGTTTCT    |
| <b>IL-17A</b>                  | TTTAACTCCCTTGGCGCAAAA      | CTTCCCTCCGCATTGACAC       |
| <b>IL-17F</b>                  | CTGGAGGATAAACTGTGAGAGT     | TGCTGAATGGCGACGGAGTTC     |
| <b>IL-22</b>                   | CATGCAGGAGGTGGTACCTT       | CAGACGCAAGCATTCTCAG       |
| <b>ROR<math>\gamma</math>t</b> | GACCCACACCTCACAAATTGA      | AGTAGGCCACATTACTGCT       |
| <b>T-bet</b>                   | GTTCCATTCTGTCCTTC          | CCTTGTTGTTGGTGAGCTT       |
| <b>TGF<math>\beta</math>1</b>  | TGGAGCAACATGTGGAAGTCTA     | AGACAGCCACTCAGGCGTATC     |
| <b>TNF<math>\alpha</math></b>  | ATGAGCACAGAAAGCATGATC      | TACAGGCTTGTCCTCGAATT      |
| <b>TSLP</b>                    | CCCTTCACTCCCCGACAAAAC      | CAGTGGTCATTGAGGGCTTCT     |
